# Supplementary material for: Novel non-hydrolytic templated sol–gel synthesis of mesoporous aluminosilicates and their use as aminolysis catalysts
Source: Royal Society of Chemistry journal article supplement (doi:10.1039/c5ra24563j), 2016-01-01
Supplement: c5ra24563j1.pdf [file c5ra24563j1.pdf]

## Supporting materials

### **Novel Non-hydrolytic Templated Sol-Gel Synthesis of Mesoporous Aluminosilicates and Their Use as Aminolysis Catalysts**

David Skoda,<sup>a,b</sup> Ales Styskalik,<sup>a,b</sup> Zdenek Moravec,<sup>a</sup> Petr Bezdicka,<sup>c</sup> Michal Babiak,<sup>a,b</sup> Mariana Klementova,<sup>c</sup> Craig E. Barnes,<sup>d</sup> Jiri Pinkas<sup>\*,a,b</sup>

<sup>a</sup> Masaryk University, Department of Chemistry, Kotlarska 2, CZ-61137 Brno, Czech Republic

<sup>b</sup> Masaryk University, CEITEC MU, Kamenice 5, CZ-62500 Brno, Czech Republic

<sup>c</sup> Institute of Inorganic Chemistry of the ASCR, v.v.i., CZ-25068 Husinec-Rez, Czech Republic

<sup>d</sup> University of Tennessee, Department of Chemistry, Knoxville, TN 37996-1600, United States

jpinkas@chemi.muni.cz

**Table 1S.** Crystallographic data of structure **1**

## Crystal data

|                             |                                                                   |
|-----------------------------|-------------------------------------------------------------------|
| Chemical formula            | C <sub>16</sub> H <sub>46</sub> AlNO <sub>5</sub> Si <sub>4</sub> |
| $M_r$                       | 471.88                                                            |
| Crystal system, space group | Monoclinic, $P2_1/c$                                              |
| Temperature (K)             | 120                                                               |
| $a, b, c$ (Å)               | 17.8823 (3), 19.5954 (3), 17.8056 (3)                             |
| $\beta$ (°)                 | 100.948 (2)                                                       |
| $V$ (Å <sup>3</sup> )       | 6125.72 (18)                                                      |
| $Z$                         | 8                                                                 |
| Radiation type              | Mo $K\alpha$                                                      |
| $\mu$ (mm <sup>-1</sup> )   | 0.24                                                              |
| Crystal size (mm)           | 0.12 × 0.12 × 0.10                                                |

## Data collection

Diffractometer AFC11 (Right): Eulerian 3 circle diffractometer

|                                                                                     |                    |
|-------------------------------------------------------------------------------------|--------------------|
| $T_{\min}, T_{\max}$                                                                | 0.891, 1.000       |
| No. of measured,<br>independent and<br>observed [ $I > 2\sigma(I)$ ]<br>reflections | 72044, 11625, 9324 |
| $R_{\text{int}}$                                                                    | 0.039              |
| $(\sin \theta/\lambda)_{\max}$ (Å <sup>-1</sup> )                                   | 0.610              |

## Refinement

|                                                             |                               |
|-------------------------------------------------------------|-------------------------------|
| $R[F^2 > 2\sigma(F^2)],$<br>$wR(F^2), S$                    | 0.049, 0.142, 1.04            |
| No. of reflections                                          | 11625                         |
| No. of parameters                                           | 677                           |
| No. of restraints                                           | 639                           |
| H-atom treatment                                            | H-atom parameters constrained |
| $\Delta\rho_{\max}, \Delta\rho_{\min}$ (e Å <sup>-3</sup> ) | 0.66, -0.52                   |

Computer programs: *CrystalClear*-SM Expert 2.0 r15 (Rigaku, 2011), *CrysAlis PRO*, Agilent Technologies, Version 1.171.37.35 (release 13-08-2014 CrysAlis171 .NET) (compiled Aug 13 2014, 18:06:01), *SHELXL*2014/7 (Sheldrick, 2014).

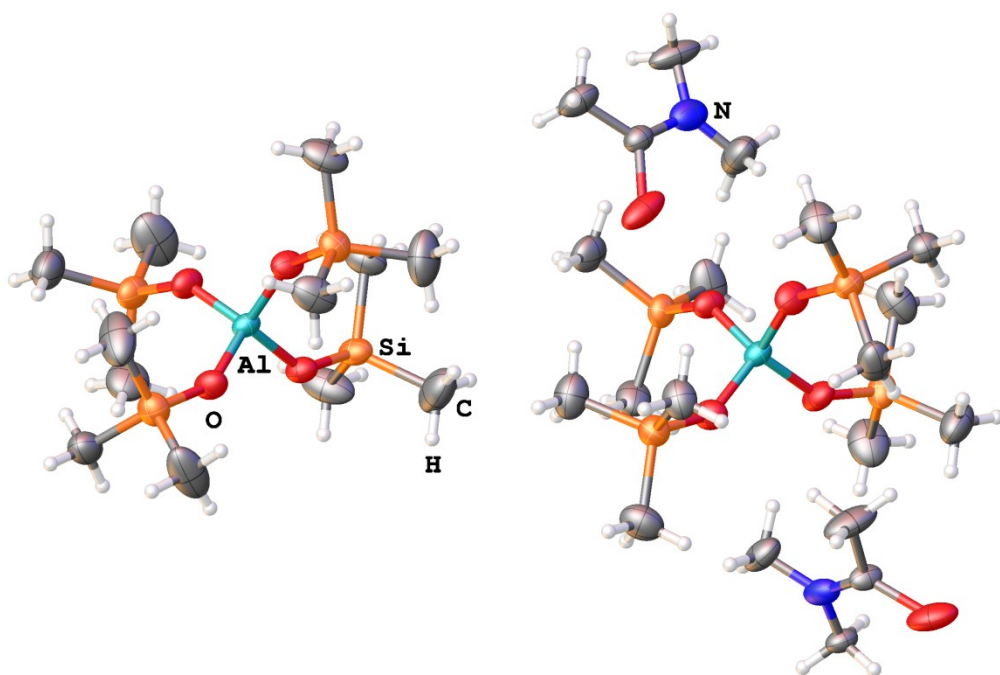

**Fig. 1S** Crystal structure of  $[\text{Me}(\text{C})\text{OHNMe}_2]^+ [\text{Al}(\text{OSiMe}_3)_4]^-$  (**1**). The temperature ellipsoids are displayed at 50% probability level. Only the first parts of disordered moieties are displayed for clarity.

The structure was solved using *SHELXT* program and refined (full matrix least-squares refinement on  $F^2$ ) using *SHELXL* program. Both symmetrically independent cation fragments were disordered; the correct orientation of each part was selected according to electron densities at terminal positions, the largest densities were assigned to oxygen atoms. The electroneutrality condition requires the dimethylacetamide to be protonated; however relevant hydrogen atoms could not be located in the difference Fourier map. The protonation of  $\text{Me}_2\text{N}-$  fragments is unlikely, because the observed electron density at the position of disordered cations is rather planar. Also the refinement with protonated oxygens did not lead to a reasonable model and the location of proton remains uncertain. One  $\text{Me}_3\text{Si}-$  moiety of one anionic fragment was also refined as disordered. Disordered fragments were treated by geometrical similarity restraints and by ADP restraints and the sum occupancies of relevant fragments were set to 1. All non-hydrogen atoms were refined anisotropically. All hydrogen atoms (of methyl and hydroxyl groups) were placed at calculated positions and refined as riding and rotating, with their  $U_{\text{iso}}$  set to 1.5  $U_{\text{eq}}$  of carrier atom.

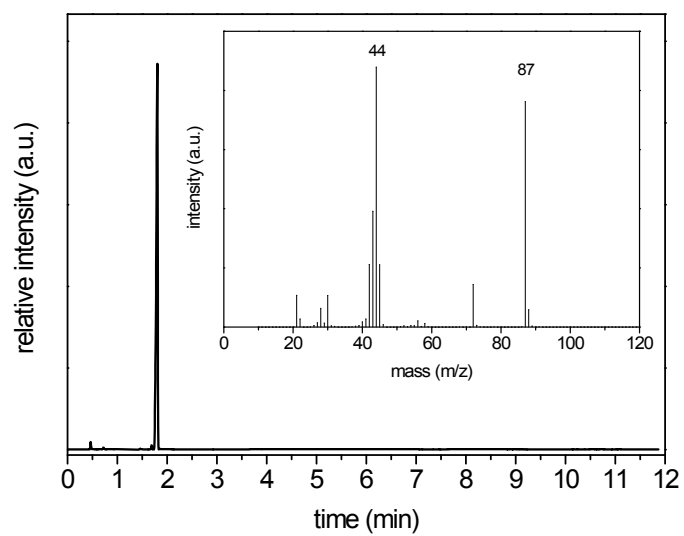

**Fig. 2S** GC-MS of byproducts separated from templated sol-gel reaction SiAlF2. The inset represents mass spectrum of N,N-dimethylacetamide (r.t. 1.8 min)

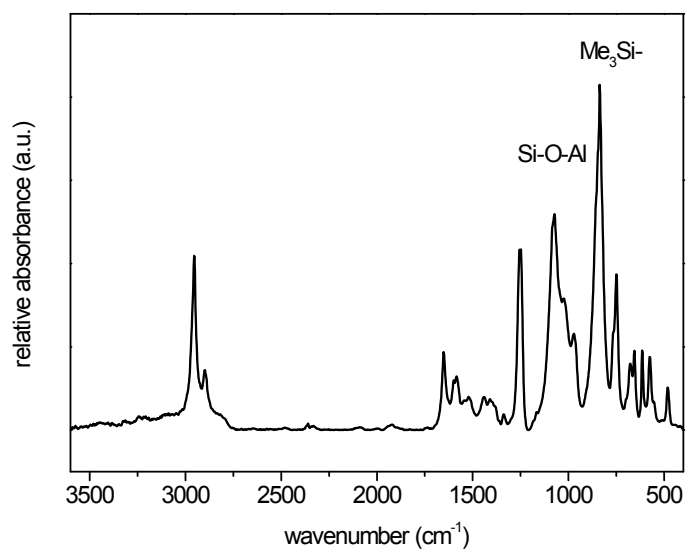

**Fig. 3S** IR spectra of  $[\text{Me}(\text{C})\text{OHNMe}_2]^+ [\text{Al}(\text{OSiMe}_3)_4]^-$  (**1**)

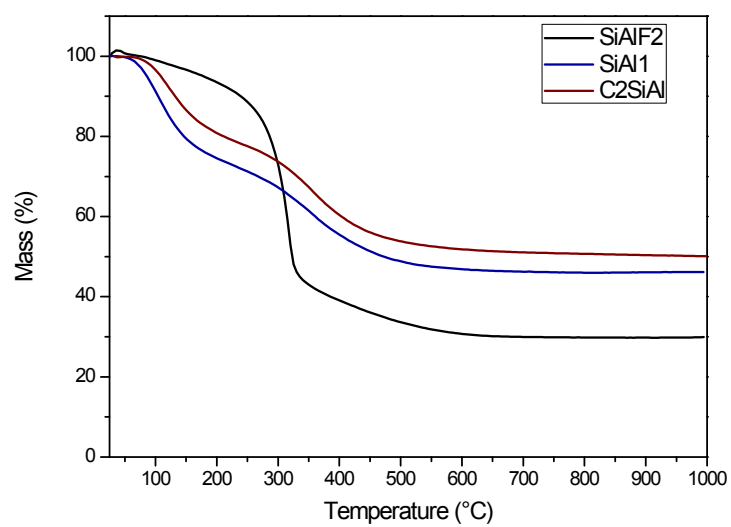

**Fig. 4S** TG curves of aluminosilicate xerogels

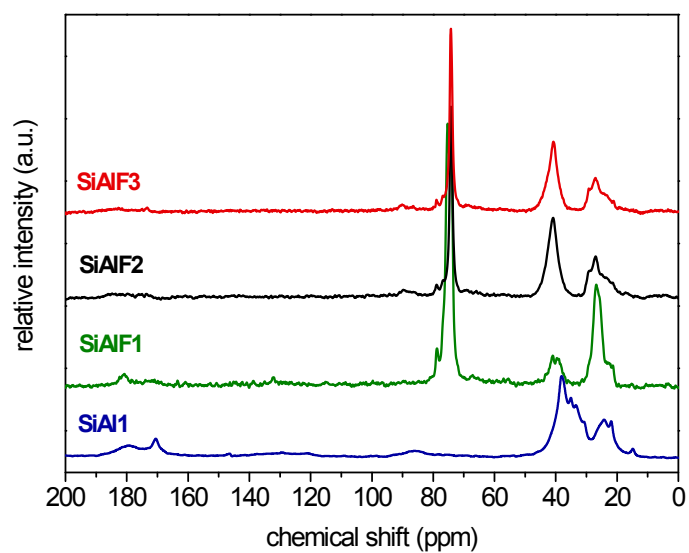

**Fig. 5S**  $^{13}\text{C}$  CPMAS NMR spectra of dried aluminosilicate xerogels. The signals represent residual organic groups and copolymer template

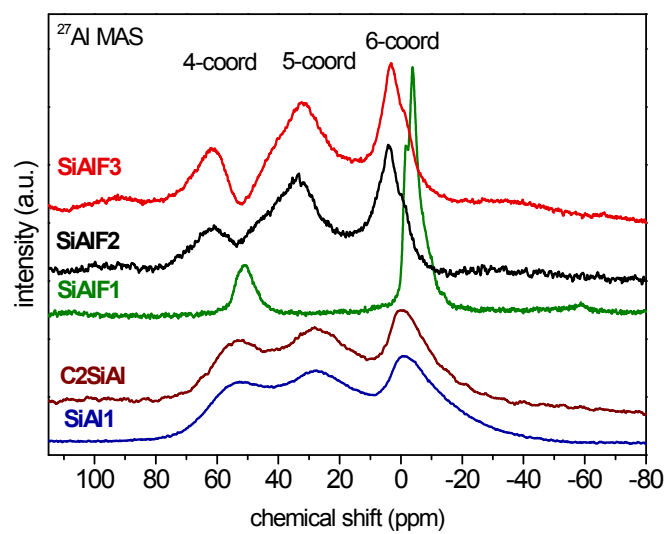

**Fig. 6S**  $^{27}\text{Al}$  MAS NMR spectra of dried aluminosilicate xerogels

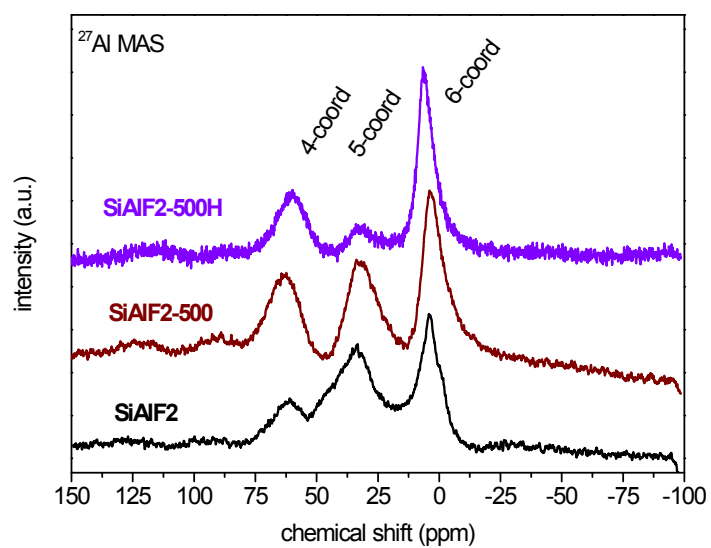

**Fig. 7S**  $^{27}\text{Al}$  MAS NMR spectra of SiAlF2, SiAlF2-500, and SiAlF2-500H xerogel after treatment in boiling water

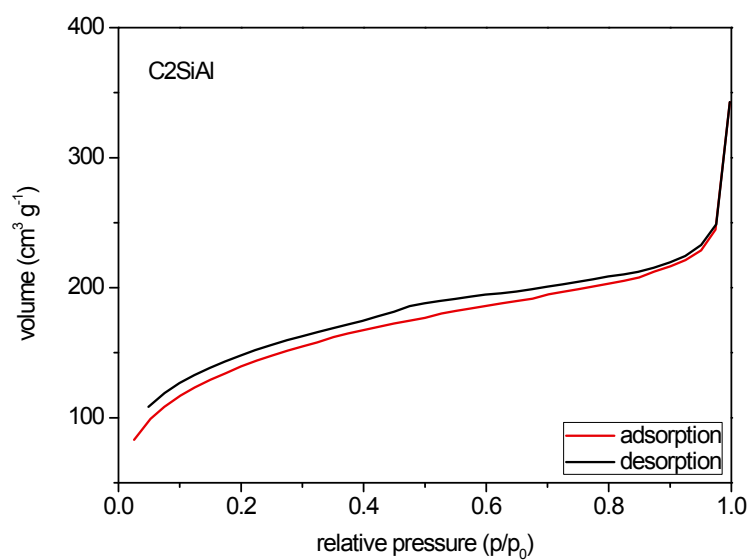

**Fig. 8S** N<sub>2</sub> Adsorption/desorption isotherm of the dried sample prepared from (AcO)<sub>3</sub>Si(CH<sub>2</sub>)<sub>2</sub>Si(OAc)<sub>3</sub>

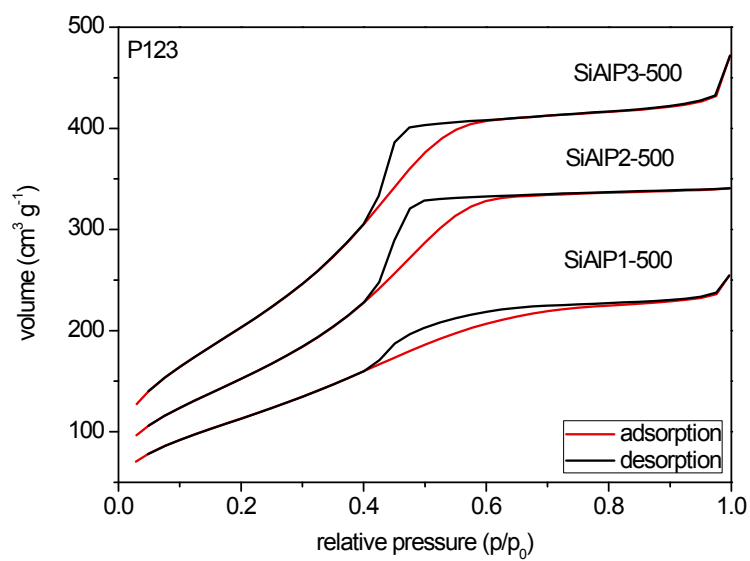

**Fig. 9S** N<sub>2</sub> Adsorption/desorption isotherms of the calcined aluminosilicate xerogels prepared with P123 template

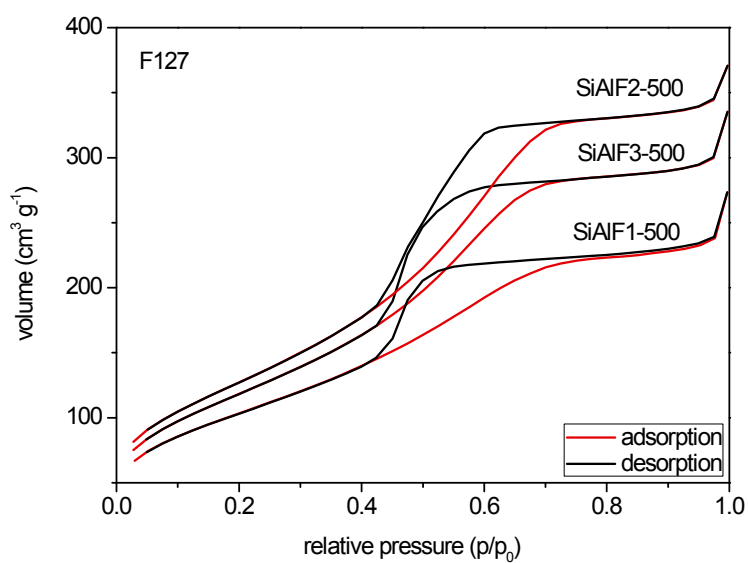

**Fig. 10S** N<sub>2</sub> Adsorption/desorption isotherms of the calcined aluminosilicate xerogels prepared with F127 template

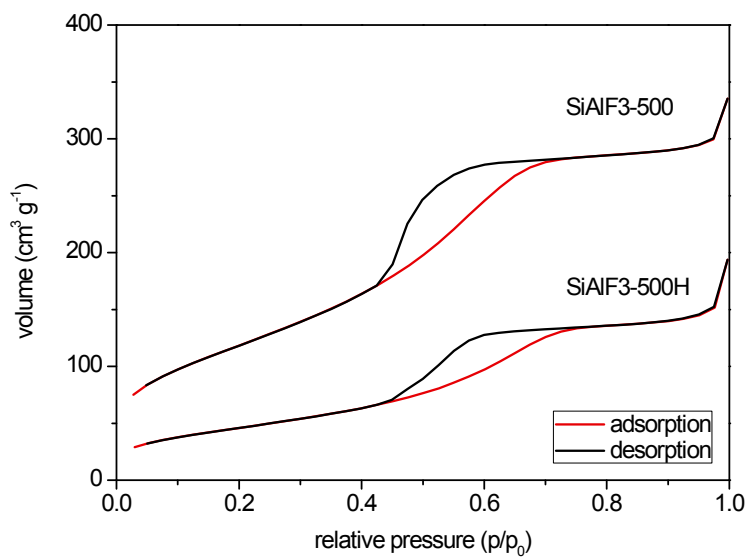

**Fig. 11S** N<sub>2</sub> Adsorption/desorption isotherms of the calcined sample SiAlF3-500 and water treated sample SiAlF3-500H



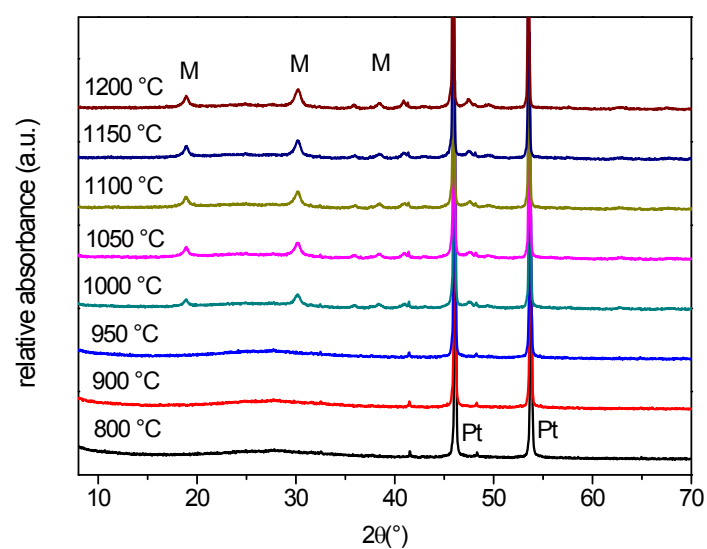

**Fig. 12S** High temperature powder XRD of calcined aluminosilicate (SiAlF2-500). Diffractions labeled as M are attributed to mullite.

## Catalysis

### Aminolysis of styrene oxide

Conditions: 25 mg of calcined aluminosilicate xerogel, 5 mmol of substrates, 5 cm<sup>3</sup> of toluene, 50 °C.

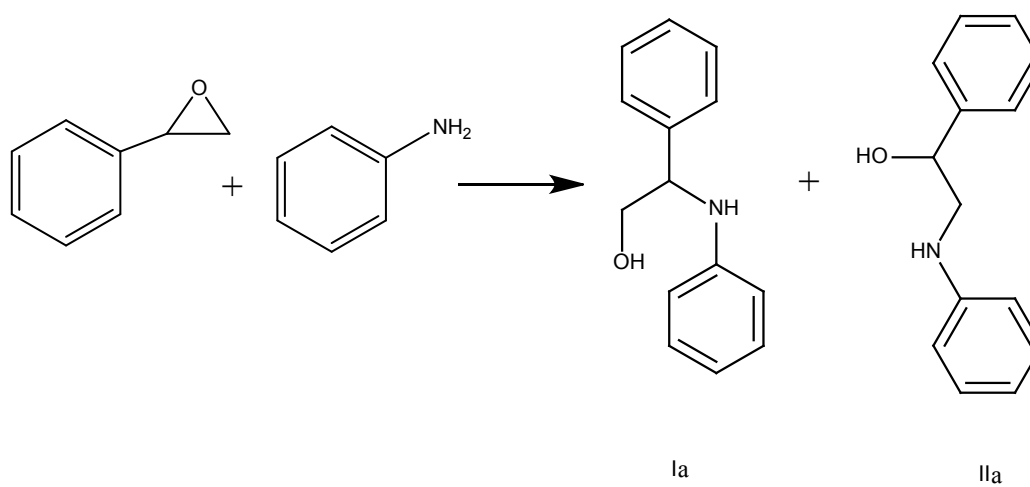

**Fig. 13S** Aminolysis of styrene oxide with aniline

## Alcoholysis of styrene oxide

Conditions: 25 mg of calcined aluminosilicate xerogel, 5 mmol of substrates, 5 cm<sup>3</sup> of toluene, 50 °C.

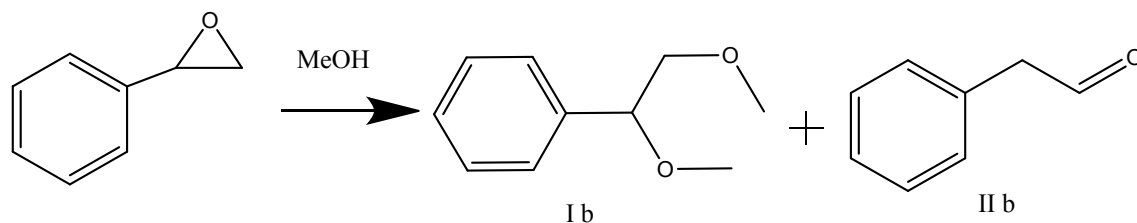

**Fig. 14S** Alcoholysis of styrene oxide with MeOH

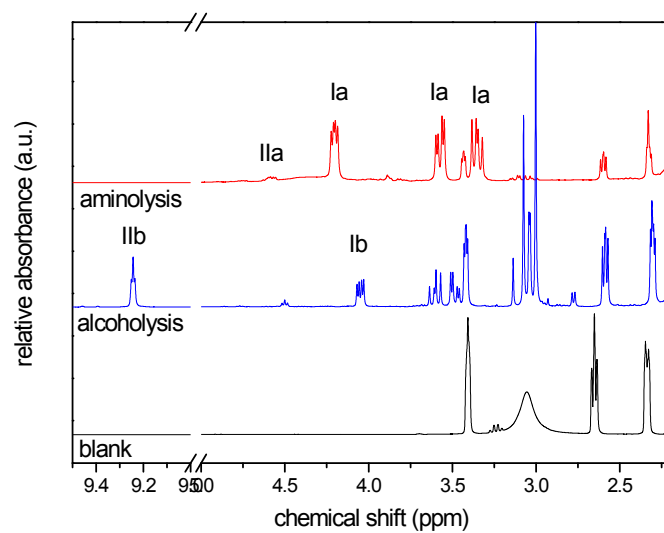

**Fig. 15S** <sup>1</sup>H NMR spectra of catalytic reaction mixtures after alcoholysis (blue) and aminolysis (red) of styrene oxide with aniline. The bottom spectrum represents blank reaction.

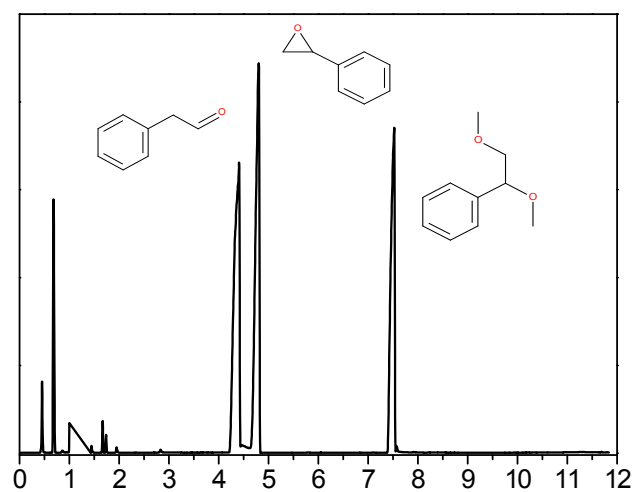

**Fig. 16S** GC chromatogram of alcoholysis reaction mixture
